# Supplementary material for: Constructing various metal–organic frameworks by mixed pyridine–acylamide and carboxylate ligands: ring-like or helical building blocks
Source: Royal Society of Chemistry journal article supplement (doi:10.1039/c4ce00796d), 2014-01-01
Supplement: c4ce00796d1.pdf [file c4ce00796d1.pdf]

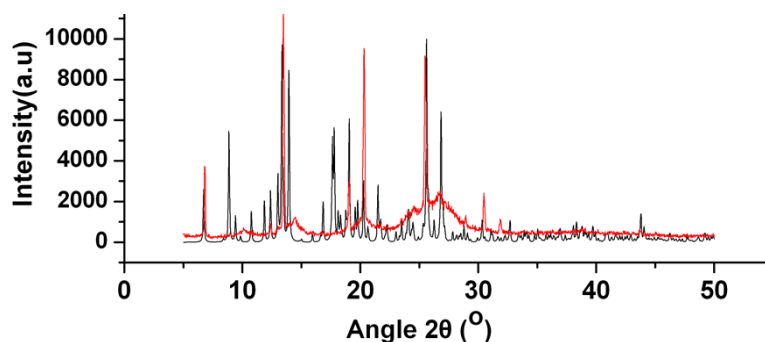

**Figure S1.** XRPD patterns of the complex **1** crystals (red), compared with the simulated XRPD pattern of complex **1** (black).

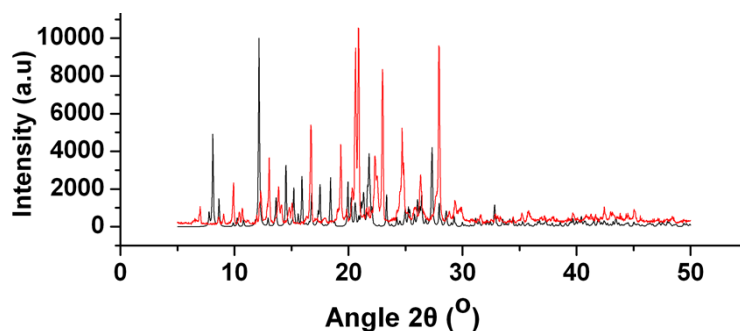

**Figure S2.** XRPD patterns of the complex **2** crystals (red), compared with the simulated XRPD pattern of complex **2** (black).

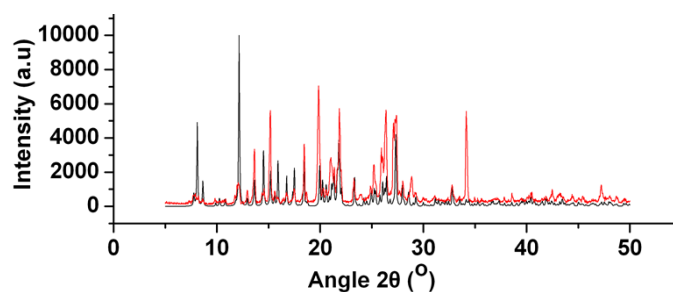

**Figure S3.** XRPD patterns of the complex **3** crystals (red), compared with the simulated XRPD pattern of complex **3** (black).

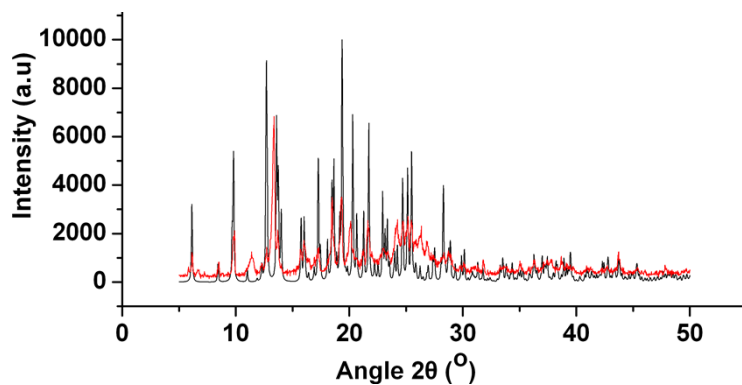

**Figure S4.** XRPD patterns of the complex **4** crystals (red), compared with the simulated XRPD pattern of complex **4** (back).

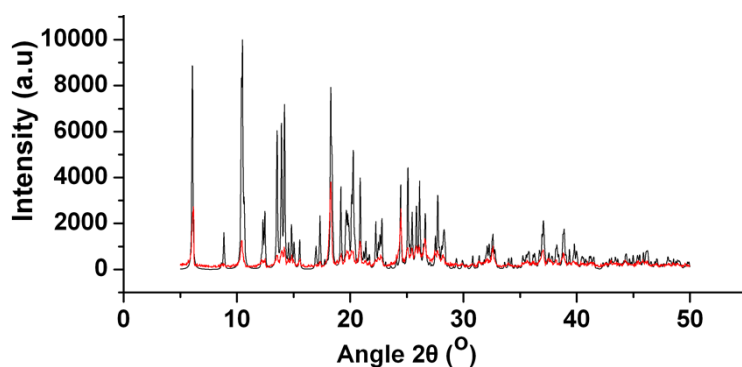

**Figure S5.** XRPD patterns of the complex **6** crystals (red), compared with the simulated XRPD pattern of complex **6** (back).

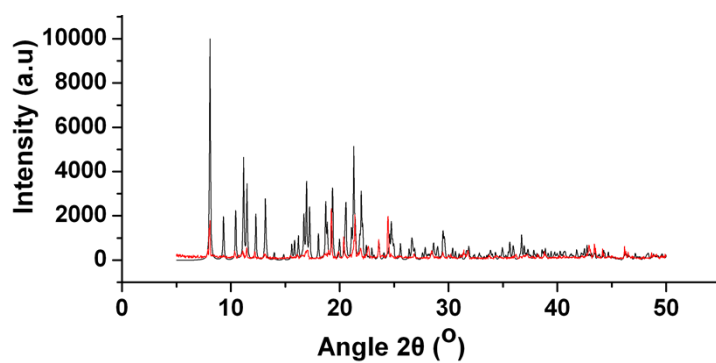

**Figure S6.** XRPD patterns of the complex **7** crystals (red), compared with the simulated XRPD pattern of complex **7** (back).
